# Supplementary material for: The genome-wide landscape of C:G > T:A polymorphism at the CpG contexts in the human population
Source: PubMed Central journal article supplement (PMC7106825; doi:10.1186/s12864-020-6674-1), 2020-03-30
Supplement: 12864_2020_6674_MOESM2_ESM.pdf [file 12864_2020_6674_MOESM2_ESM.pdf]

**Fig. S1**

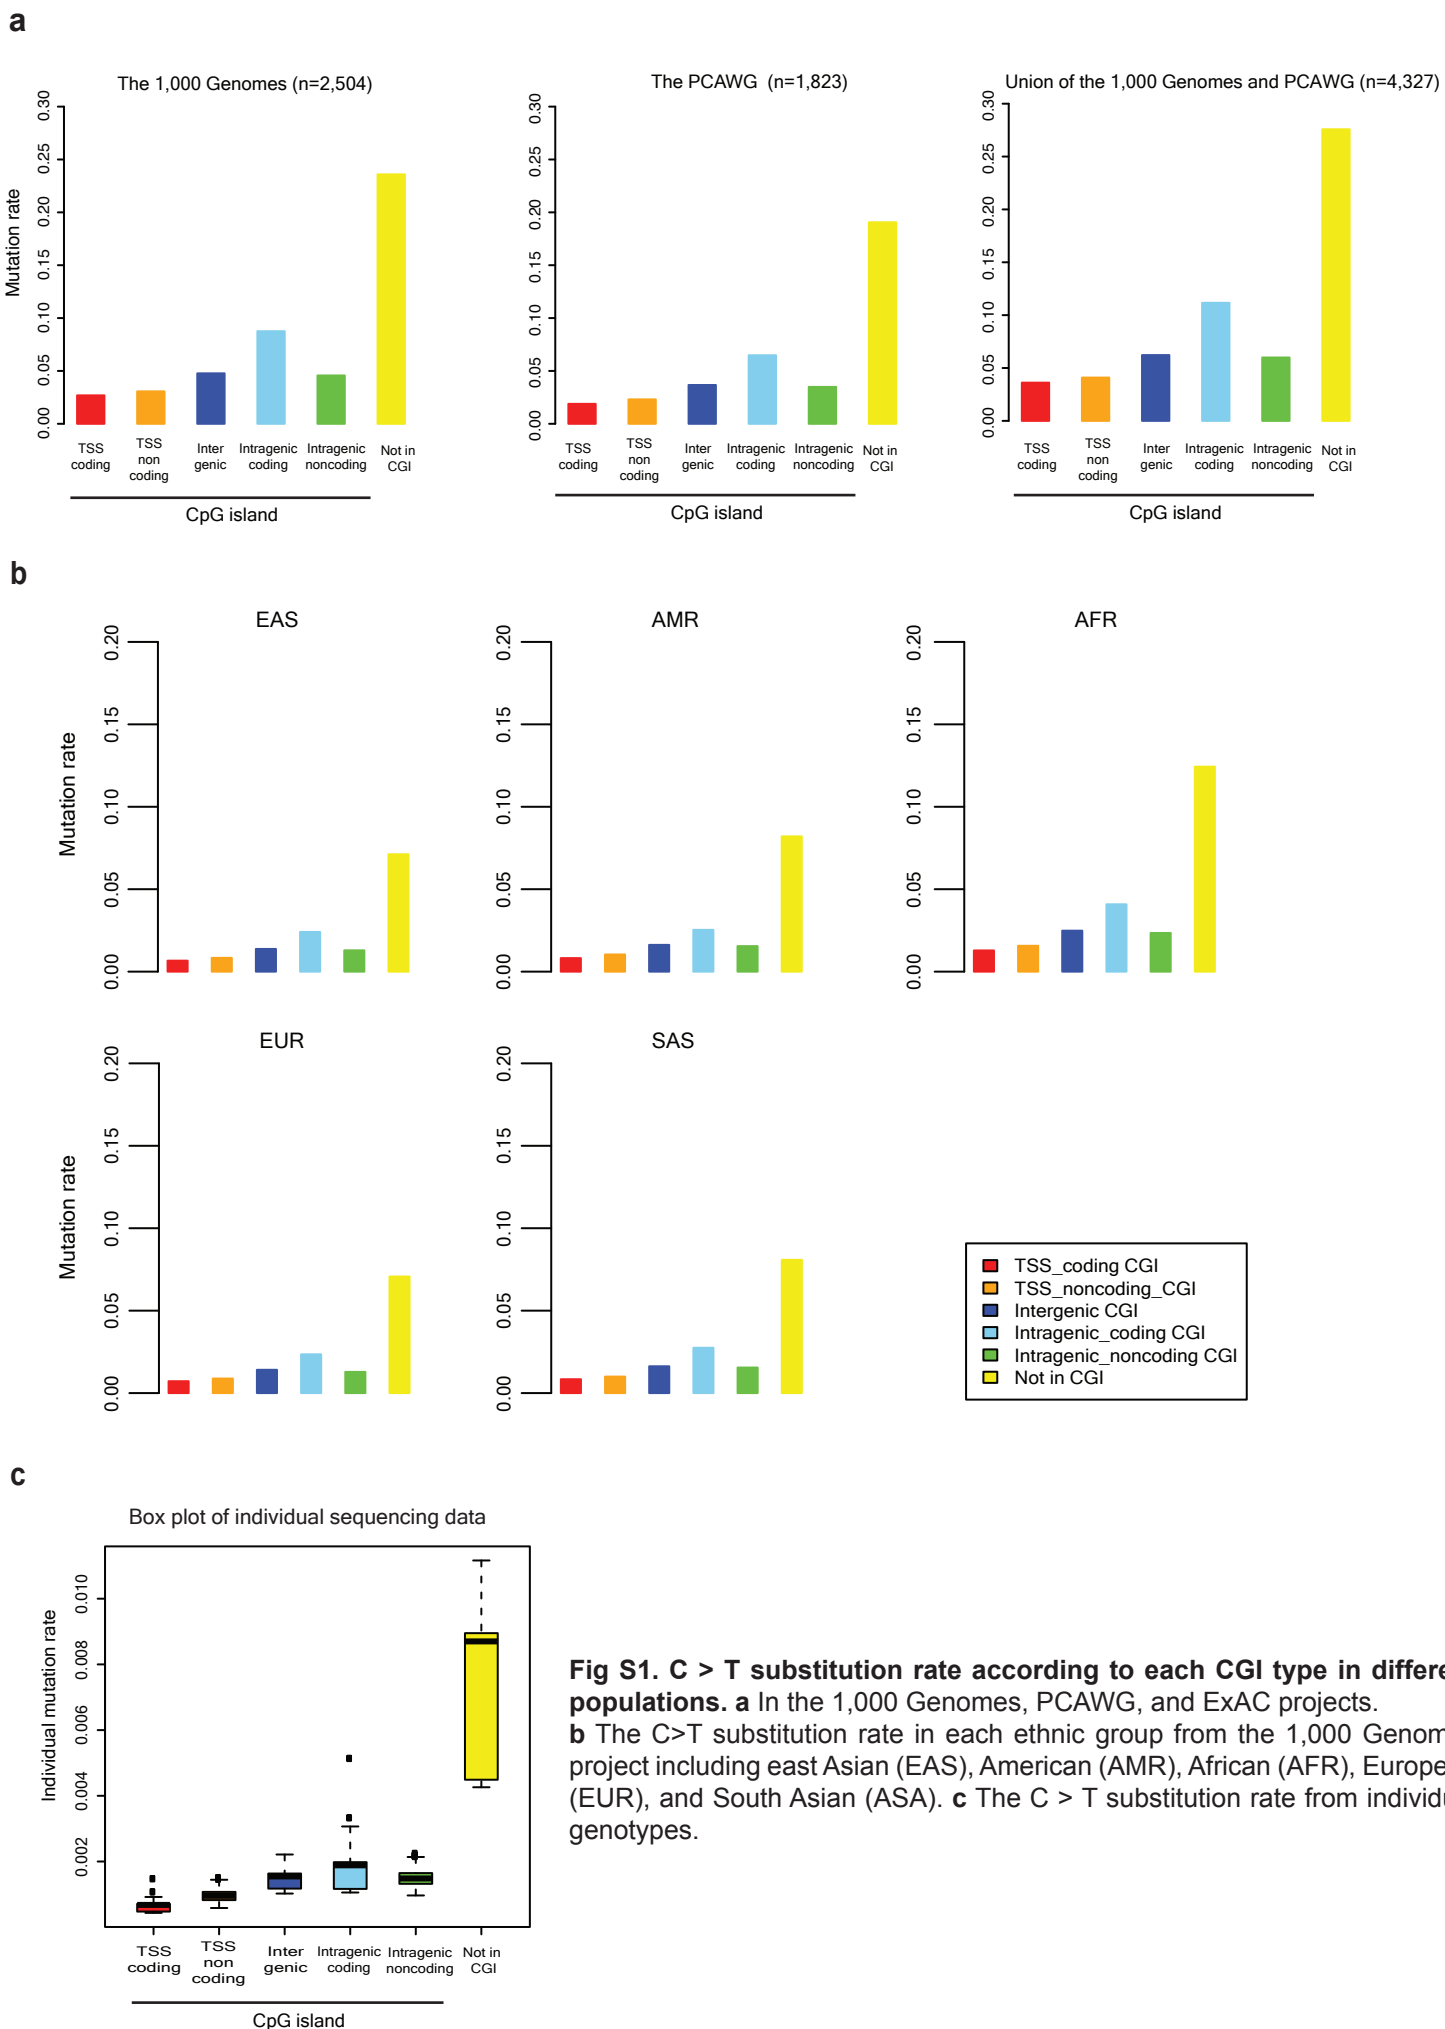

Fig. S2

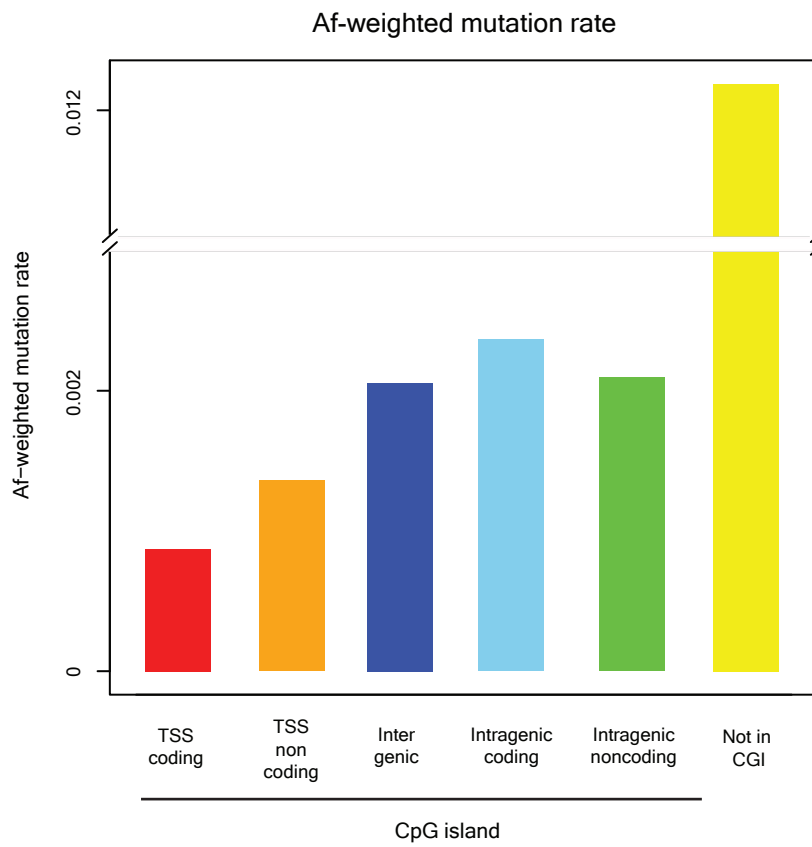

Fig S2. Af-weighted C>T substitution rate according to the CGI types.

Fig. S3

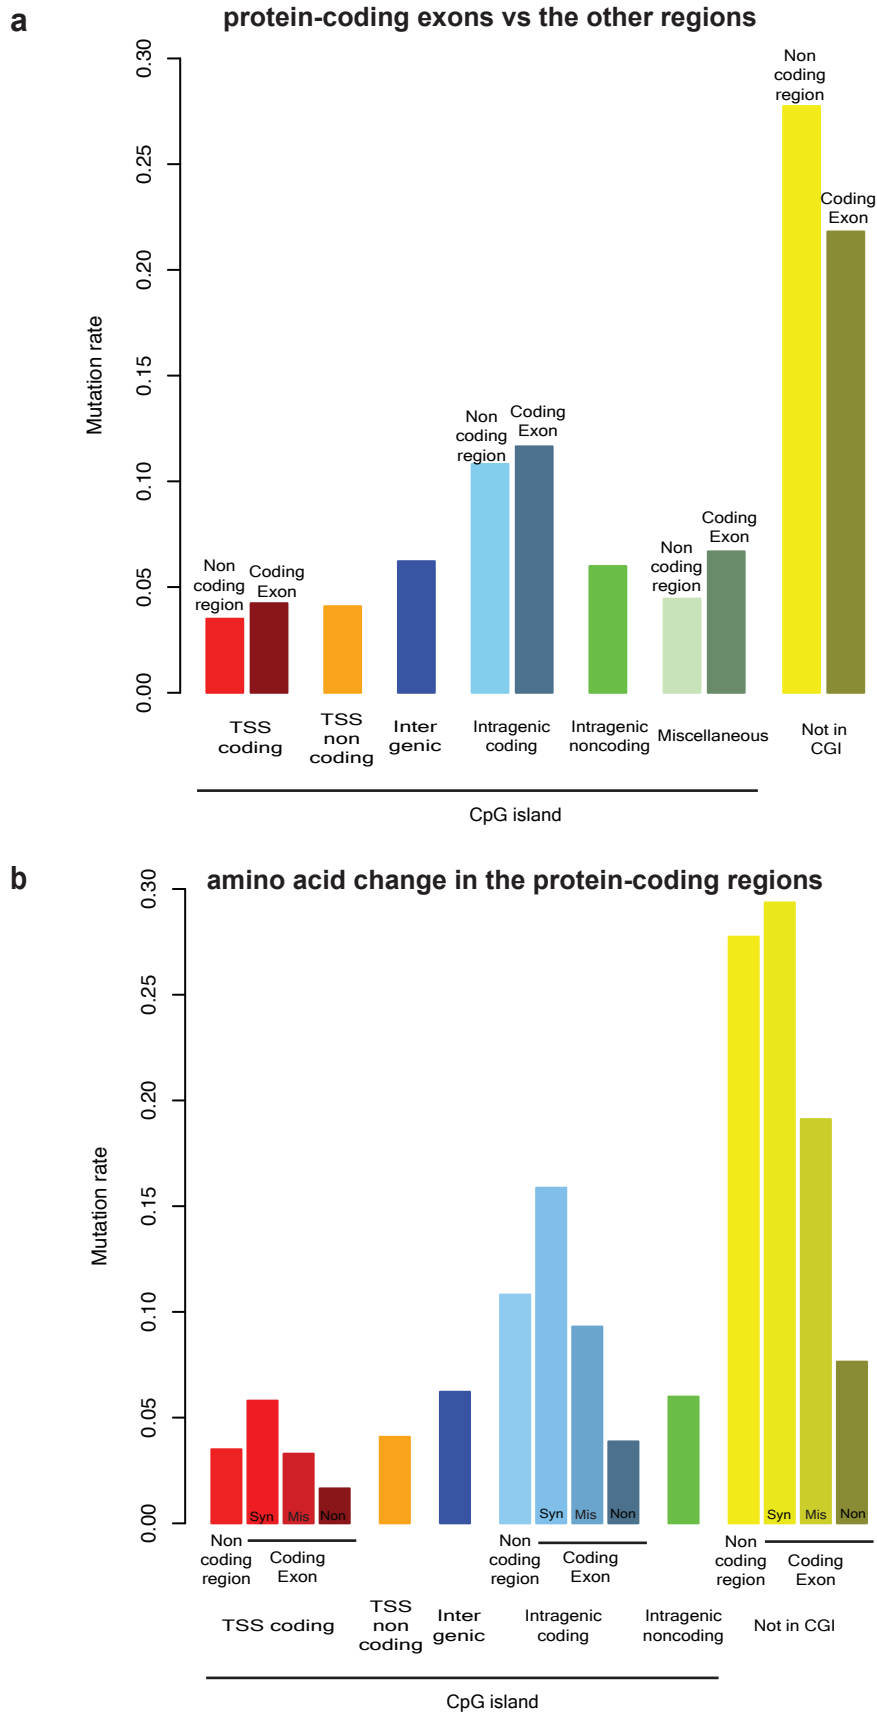

**Fig S3. C > T substitution rate in the protein-coding exons and the non-coding regions in each CGI type. a** C > T transition rate is more affected by the CGI types compared to whether certain CpGs are located in protein-coding exons or not. **b** The C > T transition rate in the non-coding regions has higher negative selection pressures compared to synonymous-primed loci. Interestingly, the non-coding regions in the TSS-coding and intragenic-coding CGIs have higher negative selection pressures compared to the non-CGIs. This implies that the non-coding sequences in a transcription start site or a gene body may be important in the human reproduction. Syn: synonymous-primed, Mis: missense-primed, Non: nonsense-primed

Fig. S4

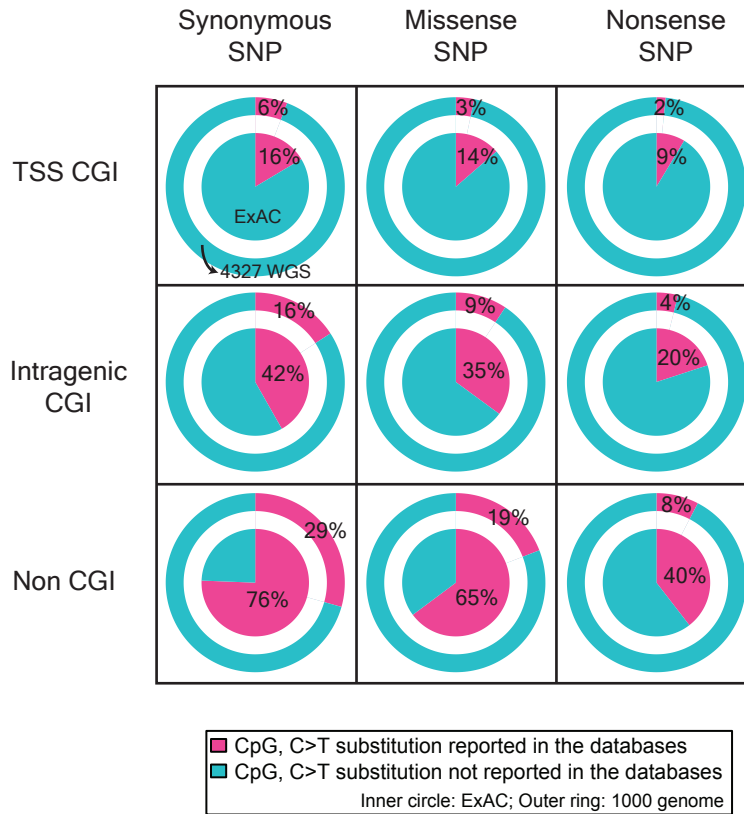

**Fig S4. Proportions of the reported C > T substitutions at all the CpG contexts in the coding sequences.** Among all cytosines ( $0\% \leq \text{methylation level} \leq 100\%$ ) at the CpG dinucleotide sequence contexts in the coding sequences, proportions of the reported C > T substitutions in the ExAC (inner circle) and the 1,000 Genomes and PCAWG (outer ring) database are illustrated. Nonsense-primed CpG loci are negatively selected compared to missense-primed and silent-primed CpG loci.
